# Supplementary material
Source: publisher figshare collection journal article supplement (https://gsajournals.figshare.com/ndownloader/files/26754095)
Supplement: Supplementary file 1 [file 26754095]

## Sheet: Sheet1
Table S3 Number of the row plots of HIFs grown in 2019 when UAS and ruler phenotyping has been conducted. Population backgrounds of HIFs were presented as column wise while SNP calls of HIFs were presented as row wise. N/A stand for not applicable. In total, 18 ranges with 16 plots each were grown. In the remaining row-plots of the HIFs, parental lines and inbred stalkers were grown.
SNP1 / SNP2	Population Backgrounds
	LH82 x LAMA/YC	NC356 x Ki3	Ki3 x NC356	Tx740 x NC356
XX / XX	48	33	2	N/A
XX / XY	4	5	N/A	N/A
XX / YY	16	4	6	N/A
XY / XX	6	2	2	N/A
XY / XY	N/A	N/A	4	N/A
XY / YY	2	N/A	12	N/A
YY / XX	24	32	13	2
YY / XY	2	N/A	7	N/A
YY / YY	2	N/A	17	2
